# Supplementary material for: Sensitive determination of total microcystins with GC-MS method by using methylchloroformate as a derivatizing reagent
Source: Royal Society of Chemistry journal article supplement (doi:10.1039/c3ay26195f), 2013-01-01
Supplement: c3ay26195f.pdf [file c3ay26195f.pdf]

## Supplementary material

### Sensitive Determination of Total microcystins with GC-MS method by using methylchloroformate as a derivatizing reagent

Xiaye Xu<sup>1,2</sup>, Ruipeng Yu<sup>2</sup>, Li-ping Wang<sup>2</sup>, Shengfang Wu<sup>2</sup> and Qijun Song<sup>1\*</sup>

1 The Key Laboratory of Food Colloids and Biotechnology, Ministry of Education; 2 State Key Laboratory of Food Science and Technology, Jiangnan University, Wuxi 214122, China

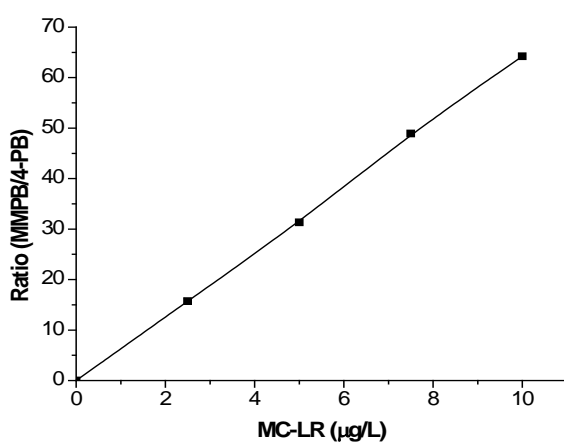

Fig. S1 The linear relationship between the ratio of MMPB to 4-PB and the concentration of MC-LR (0-10.0µg/mL).

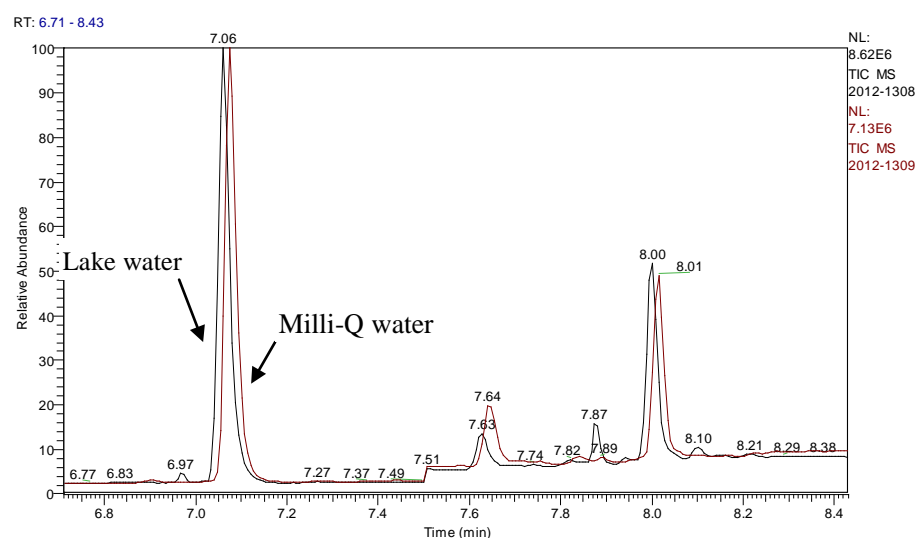

Fig. S2. The GC/MS profiles of the MMPB-OCH<sub>3</sub> and the internal standard 4-PB-OCH<sub>3</sub> in Milli-Q water and Tai Lake water.
